# Supplementary material
Source: publisher figshare collection journal article supplement (https://acs.figshare.com/ndownloader/files/4191427)
Supplement: Supplementary file 1 [file 4191427]

## Supporting Online Material For:

# Polydispersity-Driven Block Copolymer Amphiphile Self-Assembly into Football-Shaped Micelles

Andrew L. Schmitt, Milton H. Repollet-Pedrosa, Mahesh K. Mahanthappa\*

Department of Chemistry, University of Wisconsin-Madison, 1101 University Avenue, Madison, WI 53706 (USA)

## Contents

|                                                                                    |    |
|------------------------------------------------------------------------------------|----|
| OBO synthesis and molecular characterization .....                                 | 2  |
| Micelle solution preparation .....                                                 | 3  |
| Dynamic light scattering.....                                                      | 3  |
| Synchrotron small angle x-ray scattering.....                                      | 5  |
| Differential scanning calorimetry .....                                            | 7  |
| Sample vitrification and cryo-TEM imaging.....                                     | 8  |
| Cryo-TEM of monodisperse mOBO-w51.....                                             | 8  |
| Cryo-TEM images for prolate spheroids formed by polydisperse OBO surfactants ..... | 9  |
| Molecular weight distribution analysis .....                                       | 9  |
| Prolate ellipsoid mean curvature.....                                              | 11 |
| References .....                                                                   | 12 |

## OBO synthesis

OBO triblock copolymers with polydisperse middle B blocks were synthesized using tandem chain transfer ring-opening metathesis polymerization (ROMP-CT) and anionic ring-opening polymerization (AROP). ROMP of 1,5,9-dodecatriene with the difunctional chain transfer agent *trans*-1,6-bis(trifluoroacetoxy)-3-hexene yields a  $\alpha,\omega$ -dihydroxy-poly(1,4-butadiene) macroinitiator, which was then chain-extended by living anionic polymerization of ethylene oxide initiated by potassium naphthalenide. Monodisperse OBO triblock copolymers (control samples) were synthesized by a two step procedure. In the first step, anionic polymerization of 1,3-butadiene initiated with 3-(triisopropylsiloxy)-1-propyl lithium (TIPSOPrLi), followed by living chain end capping with ethylene oxide and fluoride-deprotection of the siloxy endgroup yielded a monodisperse  $\alpha,\omega$ -dihydroxy-poly(1,4-butadiene). This telechelic was then used as a macroinitiator for the living anionic ring-opening polymerization of ethylene oxide. These materials have been fully characterized using  $^1\text{H}$  NMR, SEC, and polymer degradation analyses of the end blocks, to independently analyze each homopolymer segment of the copolymers as reported in Table S1.<sup>1</sup>

## OBO Molecular Characterization

**Table S1.** Molecular and Melt-phase Characterization of OBO Triblock Copolymers

| sample   | $M_{n,B}^a$ | PDI B <sup>a</sup> | $M_{n,O}^b$ | PDI O <sup>c</sup> | $M_{n,total}^b$ | $PDI_{d,OBO}^d$ | $f_B^e$ | $N_{total}^f$ | $D_{exp}^g$<br>(nm) | $(\chi_{OB}N)^i$ | Melt-Phase<br>Morphology |
|----------|-------------|--------------------|-------------|--------------------|-----------------|-----------------|---------|---------------|---------------------|------------------|--------------------------|
| OBO-w58  | 9.3         | 1.74               | 13.0        | 1.25               | 22.3            | 1.37            | 0.48    | 331           | 43.6                | 43               | cylinders                |
| OBO-w48  | 9.3         | 1.74               | 6.7         | 1.20               | 16.0            | 1.46            | 0.64    | 247           | 33.2                | 32               | lamellae                 |
| OBO-w24  | 9.3         | 1.74               | 2.9         | 1.22               | 12.2            | 1.68            | 0.80    | 197           | 27.0 <sup>h</sup>   | 26               | cyl. + lam.              |
| OBO-w18  | 11.2        | 1.75               | 2.4         | n.d.               | 13.6            | 1.91            | 0.86    | 223           | 28.6                | 29               | dis. cyl.                |
| mOBO-w68 | 10.0        | 1.05               | 21.7        | n.d.               | 31.7            | 1.08            | 0.37    | 457           | 22.3                | 59               | lamellae                 |
| mOBO-w51 | 10.0        | 1.05               | 10.4        | n.d.               | 20.4            | 1.07            | 0.55    | 308           | 17.2                | 40               | lamellae                 |

<sup>a</sup> Determined by SEC using a Mark-Houwink corrected polystyrene calibration curve. <sup>b</sup> Calculated from  $M_{n,B}$  from SEC and quantitative  $^1\text{H}$  NMR of the triblock copolymer. <sup>c</sup> Determined directly by absolute molecular weight characterization by SEC of the O homopolymer products of metathesis degradation (see text for details). <sup>d</sup>  $PDI = M_w/M_n$  determined using SEC against a conventional polystyrene standard calibration curve. <sup>e</sup>  $f_B$  = volume fraction of poly(1,4-butadiene) determined by quantitative  $^1\text{H}$  NMR composition analyses and the homopolymer melt densities at 140 °C.<sup>2,7</sup> <sup>f</sup> Volume normalized degree of polymerization calculated using a 118 Å<sup>3</sup> monomer reference volume. <sup>g</sup> calculated based on the principal reflection  $q^*$  from synchrotron SAXS. <sup>h</sup> measured lamellar  $D$ -spacing; the  $D$ -spacing for the cylinders morphology is 24.0 nm. <sup>i</sup> Calculated at 170 °C based on  $\chi_{OB} = 0.13$  at 170 °C from OB1-6 ( $N_{vol, tot} = 82$ ,  $f_B = 0.51$ ,<sup>3</sup> and the mean field result for diblocks,  $(\chi N)_{ODT} = 10.495$ ).

## OBO Aqueous Dispersion Preparation

1 wt% OBO aqueous dispersions were made by inducing micellization from a selective solvent. De-ionized water was added to a rapidly stirred 10 wt% polymer solution in THF to a total volume such that the final polymer concentration was 1 wt%. The solutions were vigorously stirred for 1 day. These solutions were then dialyzed against deionized water using Spectra/Por dialysis membranes ( $M_w$  cutoff of 6 kDa) for 7 days, during which the deionized water reservoir was changed daily.

## Dynamic light scattering (DLS).

DLS was performed on a Beckman Coulter N5 Submicron Particle Size Analyzer equipped with an 80 Multi-TAU channel digital correlator and He-Ne laser with a wavelength of 632.8 nm. Samples were filtered (0.45  $\mu\text{m}$  pore size) into a dust-free glass cuvet. Multi-angle light scattering experiments were conducted at  $30^\circ$ ,  $60^\circ$ ,  $90^\circ$ ,  $120^\circ$  and  $150^\circ$ . The second-order auto-correlation functions from each scattering vector,  $q$ , were fit using either a single exponential with a cumulant expansion to capture the particle size polydispersity index (PI) or a double exponential decay for multimodal scatterer populations (Eq. S1 and S2, respectively) to determine the relaxation decay/s,  $\Gamma$ . The diffusion coefficients,  $D_t$ , and thus the radius of hydration,  $R_H$ , are found from fitting  $\Gamma$  vs.  $q^2$  plots (Eq. S3) and applying the Einstein Stokes relation for the diffusion of hard spheres (Eq. S4).

$$g^{(2)}(\tau) - 1 = \beta e^{-2\Gamma\tau} \left(1 + \frac{\mu_2 \tau^2}{2!}\right)^2 \quad \text{Eq. S1}$$

$$g^{(2)}(\tau) - 1 = (A_1 e^{-\Gamma_1 \tau} + A_2 e^{-\Gamma_2 \tau})^2 \quad \text{Eq. S2}$$

$$\Gamma = D_t q^2 \quad \text{Eq. S3}$$

$$R_H = \frac{k_B T}{6\pi \eta D_t} \quad \text{Eq. S4}$$

Relaxation decays for polydisperse samples with high hydrophilic content, OBO-w42 and OBO-w58 (Figure S1 (a)) were best described using a single exponential decay with a cumulant expansion to determine the polydispersity index (PI) of micellar sizes (a PI = 0 indicates a completely monodisperse ensemble). Polydisperse samples with low hydrophilic content, OBO-w18 and OBO-w24 (Figure S1 (b)) were fit using a double exponential decay function, as single exponential decay fits with cumulant expansion resulted in poor fits of the relaxation decays. Monodisperse OBO-w51 and OBO-w68 were also best fit using single exponential decay with cumulant expansion (Figure S1 (c)).

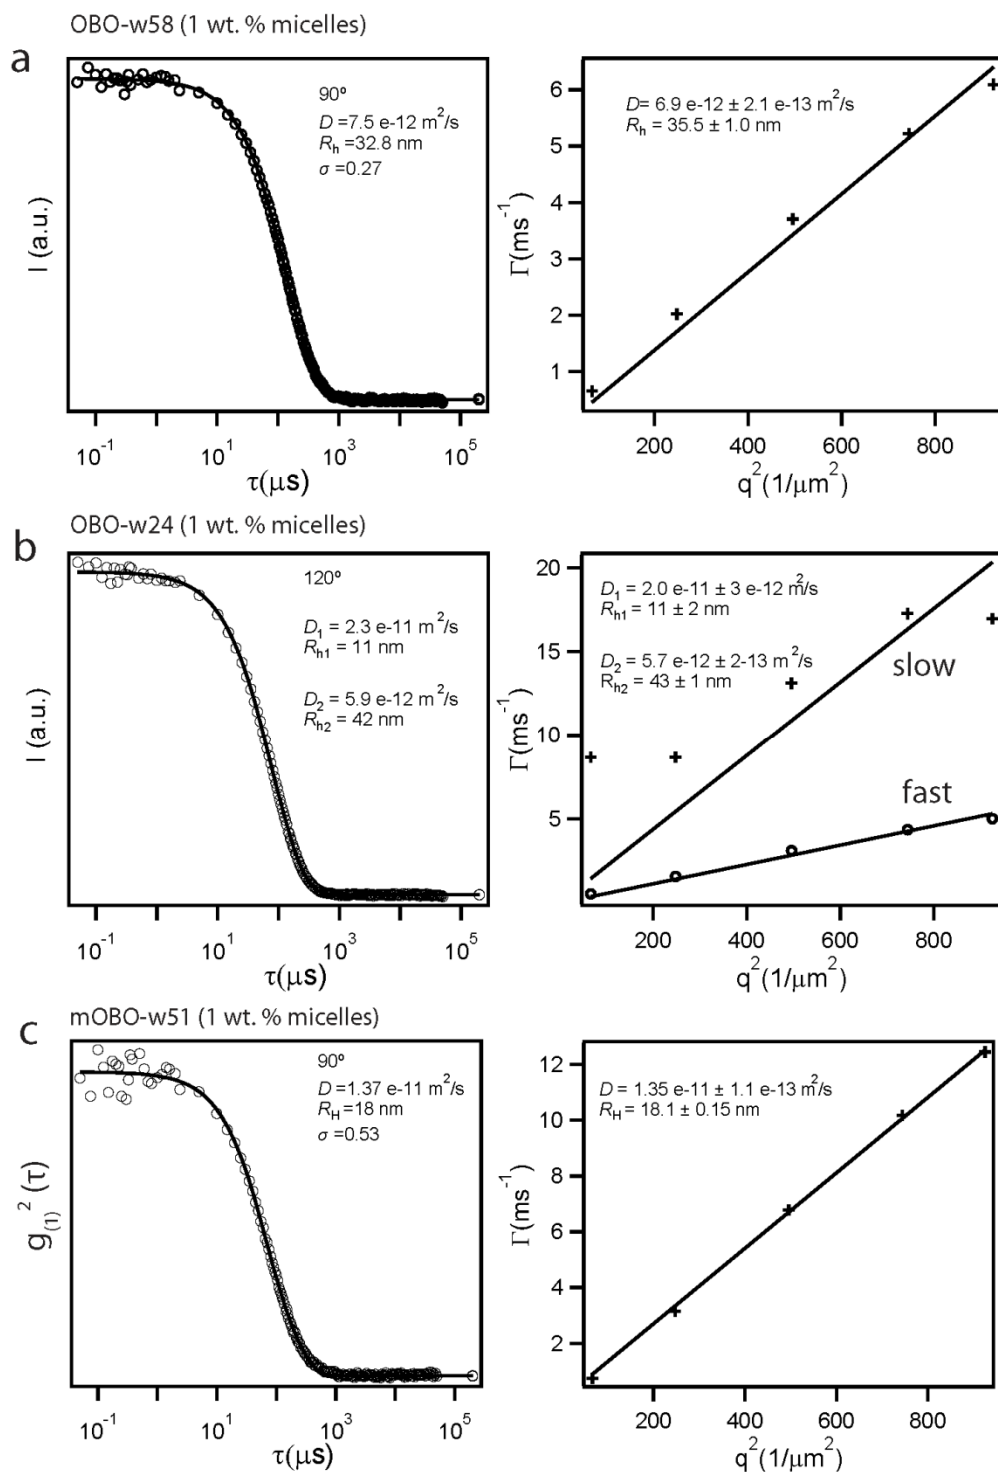

**Figure S1.** Dynamic light scattering of polydisperse OBO-w58 (a), OBO-w24 (b), and monodisperse mOBO-w51. Panels on the left show fits of the second-order autocorrelation function using single-exponential decay functions with a cumulant expansion for (a) and (c), and a double-exponential decay in (b). Double exponential decay gives information about slow (large) and fast (small) scattering populations in this apparently bimodal sample.



## Synchrotron Small Angle X-ray Scattering

Synchrotron SAXS was performed on the DuPont-Northwestern-Dow Collaborative Access Team 5-ID-D beamline (Sector 5) at the Advanced Photon Source (APS) at Argonne National Lab (Argonne, IL). 5 wt% micellar solutions were loaded into quartz capillaries and exposed to x-rays with an incident beam energy of 16 keV ( $\lambda = 0.7293 \text{ \AA}$ ) and a 3.068 m sample-to-detector distance for 5 s. Two-dimensional SAXS patterns were recorded at  $1024 \times 1024$  pixel resolution on a MAR-CCD detector (133 mm diameter active circular area) and calibrated against silver behenate. Isotropic 2D SAXS patterns were azimuthally integrated to obtain one-dimensional intensity *versus* scattering wavevector ( $q$ ) plots. These plots were background corrected using an H<sub>2</sub>O blank and fitted to various form factor scattering models using IRENA software developed by Jan Ilavsky at APS.<sup>4</sup> X-ray contrast was calculated for the core (poly(1,4-butadiene)), the shell (poly(ethylene oxide)), and the solvent (water) based on electron density. Simple sphere models fail to describe micelle x-ray scattering, even for monodisperse samples. The corona block PEO is either collapsing near the core and/or increasing the electron contrast of the water in the corona. Core-shell models with shell electron densities larger than water more adequately fit the data (OBO monodisperse control sample mOBO-w68 shown as example, Figure S2). In each least-squares fitting the corona/shell width ( $R_{\text{particle}} - R_{\text{core}}$ ) was found to be 8-9 nm; whereas the full corona width from geometrical standpoint must be much larger. Fits of OBO-w42 for rod-like core-shell model that approximates the anisotropy of a prolate spheroid are better than those provided by core-shell sphere models. SAXS fits for these low contrast samples are not particularly helpful and provide limited information in the limit of low ( $< 2$ -3) anisotropy.

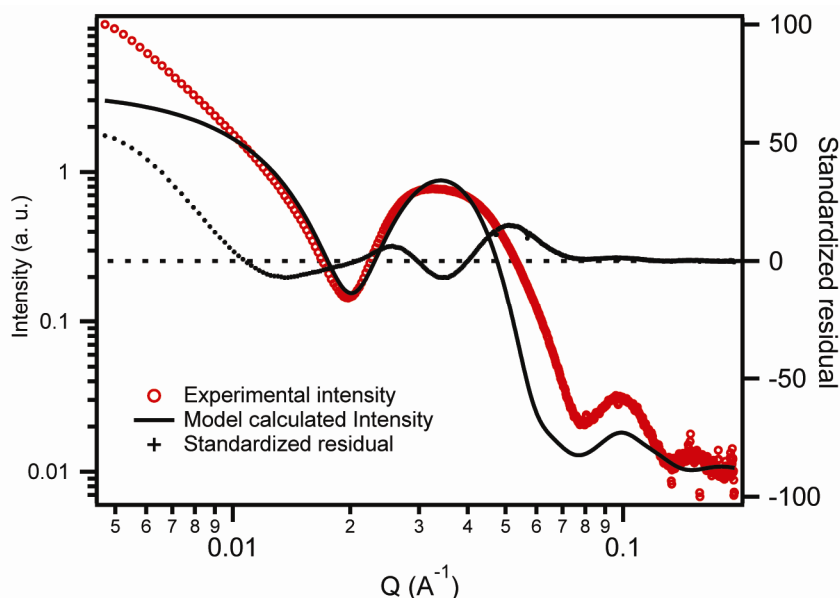

**Figure S2.** Synchrotron SAXS from a 5 wt% micellar dispersion of mOBO-w68 fit using core-shell sphere model with a Gaussian distribution of sphere sizes. Best fit parameters are  $R_{\text{core}}$  (12.7 nm),  $R_{\text{particle}} - R_{\text{core}}$  (8.5 nm), and the width of the distribution (2.0 nm).

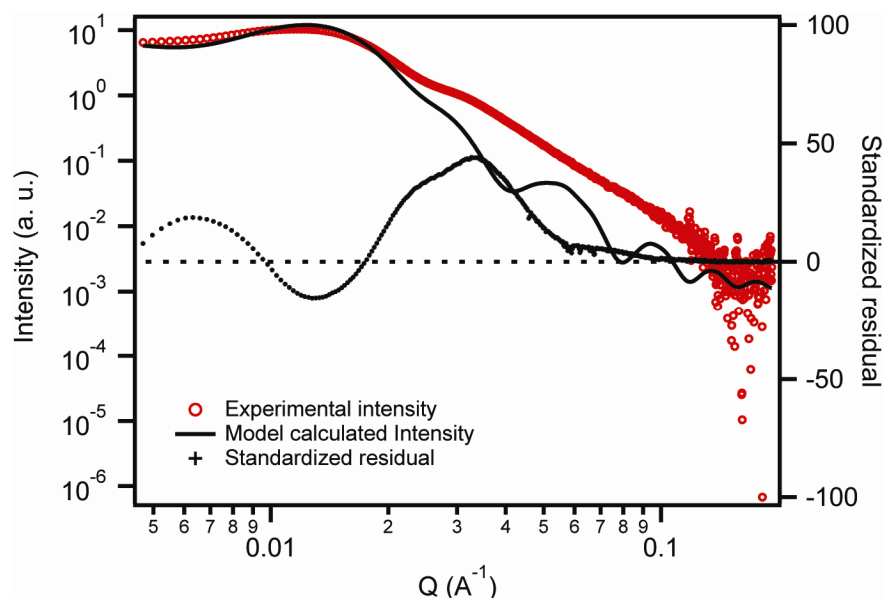

**Figure S3.** Synchrotron SAXS from a 5 wt% micellar dispersion of OBO-w42 fit using core-shell sphere model with a Gaussian distribution of sphere sizes. Best fit parameters are  $R_{\text{core}}$  (34.5 nm),  $R_{\text{particle}} - R_{\text{core}}$  (8.0 nm), and the width of the distribution (8.0 nm).

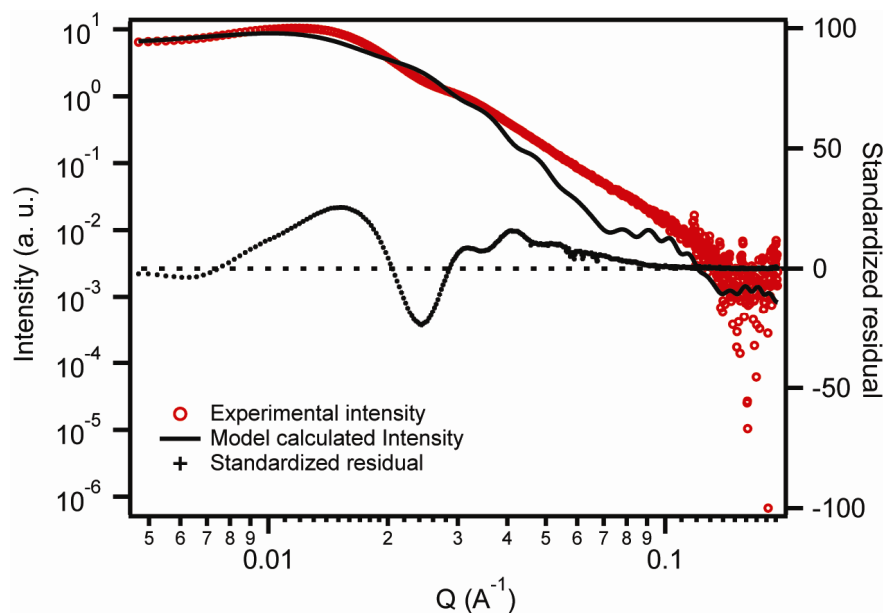

**Figure S4.** 5 wt% OBO-w42 fit using rod-like core shell model. Synchrotron SAXS from a 5 wt% micellar dispersion of OBO-w42 fit using a rod-like core-shell model with a log normal distribution of sphere sizes. Best fit parameters are  $R_{\text{core}}$  (20.0 nm), standard deviation (0.5),  $R_{\text{particle}} - R_{\text{core}}$  (9.0 nm), and rod (long) axis (46.0 nm). The resulting anisotropy is 1.2.

## Differential Scanning Calorimetry

DSC analyses were performed using a TA Instruments Q100 modulated differential scanning calorimeter under nitrogen atmosphere. Pure OBO-w42 polymer and a 1 wt% OBO-w42 micellar solution were hermetically sealed in aluminum pans. The pure polymer was cooled to -30 °C and heated to 220 °C using a heating ramp rate of 10 °C/min. The micelle solution was cooled to 5 °C and heated at 5 °C/min to 80 °C (Figure S5).

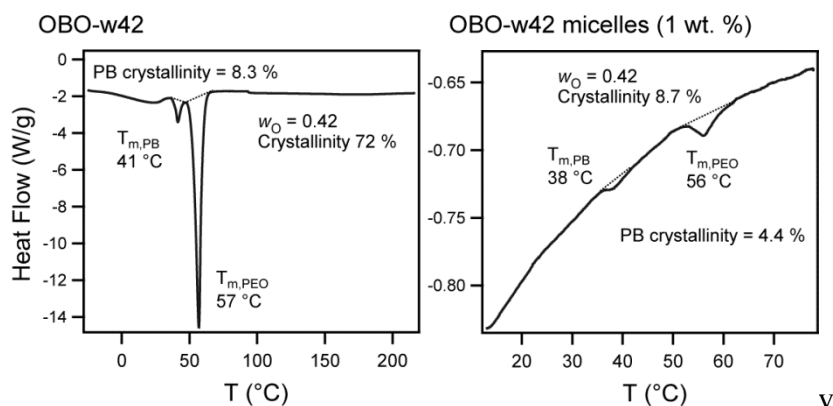

**Figure S5.** Dynamic scanning calorimetry for pure OBO-w42 and a 1 wt% aqueous dispersion of OBO-w48 in water show that OBO-w42 exhibits 72 wt% O block crystallinity and 8.3 wt% B block crystallinity. The aqueous dispersion has exhibits residual O crystallinity likely due to increased O segment density near the micellar surface that protects the PB from unfavorable contacts with water. B block crystallinity in the micelles decreases to 4.4 wt%, the melting point of this block is slightly depressed in a manner consistent with reduced crystal sizes due to nanoconfinement.

The crystallinity of OBO-w42 and the corresponding micellar dispersion were studied using dynamic scanning calorimetry (DSC). Thermal analysis for the pure triblock reveals melting endotherms upon heating at  $T_{m,B} = 41\text{ °C}$  and  $T_{m,O} = 57\text{ °C}$ . Weight percent crystallinity,  $\chi_c$ , for PEO and PB components was calculated from  $w_O$  and the theoretical heat of fusion  $\Delta H_{th}$  for perfectly crystalline PEO and PB (203 J/g<sup>5</sup> and 85.2 J/g,<sup>6</sup> respectively) using:

$$\chi_{c,O} = \frac{\Delta H_{exp,O}}{\Delta H_{th,O} \times w_O} \quad \text{Eq. S5}$$

$$\chi_{c,B} = \frac{\Delta H_{exp,B}}{\Delta H_{th,B} \times (1 - w_O)} \quad \text{Eq. S6}$$

The high *trans* content in the PB middle block gives PB chains that are 8.3 % crystalline below  $T_{m,PB} = 41\text{ °C}$  in neat polymer. In a 1 wt% solution of OBO-64 micelles, the crystallinity falls to 4.4 % with a decreased  $T_{m,PB} = 38\text{ °C}$ . Nanoscale confinement and enhanced surface effects are known to suppress

melting points and effect crystallinity and crystalline habits.<sup>7</sup> We note that the crystallinity of the corona PEO blocks is not completely inhibited in the aqueous dispersion. PEO crystallinity drops from 72 %, a typical value for bulk PEO, to 8.7 %. Neutron studies have shown that segmental PEO density is enriched near the core prior to extension out into solution.<sup>8</sup> This observed crystallinity may be due to O segment crystallization near the hydrophilic/hydrophobic interface that shields the micellar core from unfavorable interactions with water.

### **Cryogenic Transmission Electron Microscopy (CryoTEM).**

Vitrified CryoTEM specimens were prepared by placing a 5  $\mu$ L droplet of the 1% wt. micellar solution on a lacy carbon-coated copper grid (Ted Pella, Inc.) in the Vitrobot (Ted Pella, Inc.), a controlled environment vitrification system, using -2 mm blotting offset, a 1 s blot time, and a 15 s drain time for sample equilibration. Following the drain time, each sample as plunged in liquid ethane (-80 °C) and transferred under liquid nitrogen to a Gatan 626 DH or a Fischione cryo-transfer specimen holder. TEM imaging was performed at -178 °C using either a FEI Tecnai G2 F30 TEM operating at 300 kV or a LEO 912 EFTEM operating at 120 kV. Characterization was carried out at the Institute of Technology Characterization Facility at the University of Minnesota and the NSF-NSEC characterization facilities in the Materials Science Center at the UW-Madison.

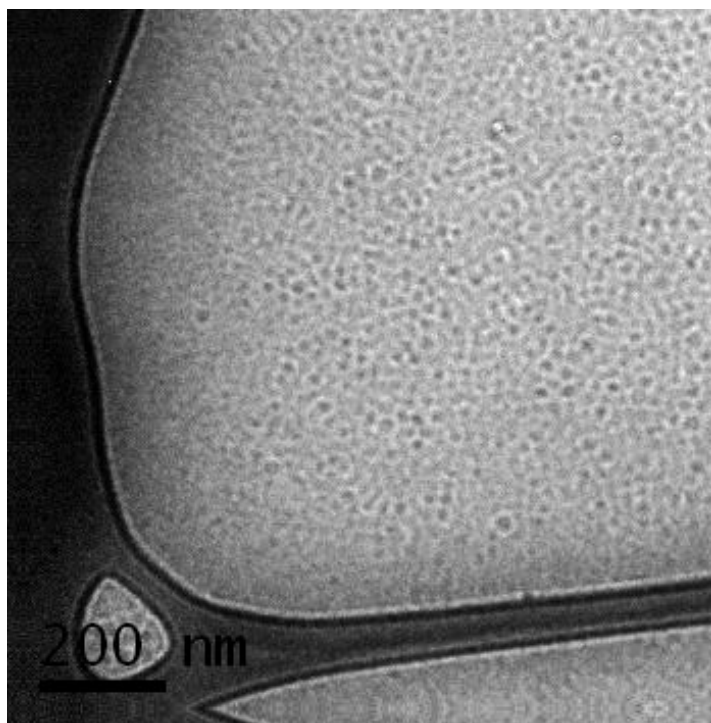

**Figure S6.** CryoTEM of monodisperse spheres of mOBO-w51.

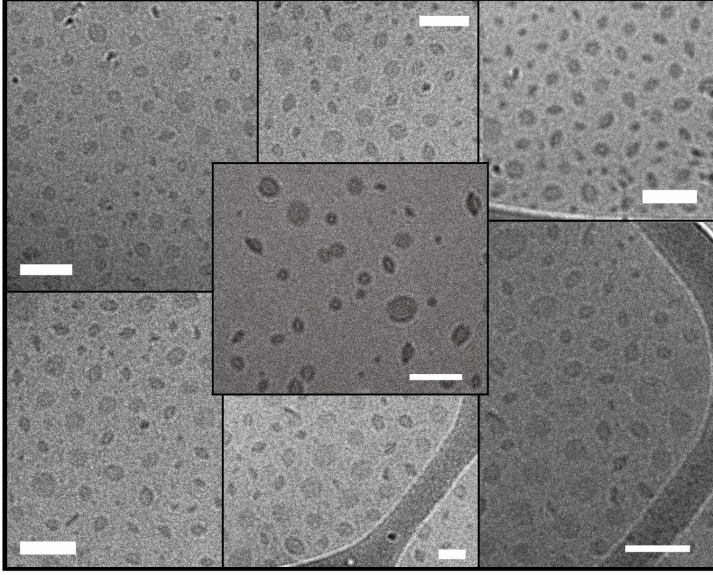

**Figure S7.** Collage of prolate spheroid morphology adopted by polydisperse OBO surfactants. All scale bars are 100 nm

### Analysis of Molecular Weight Distributions

Using the independent assessment of  $M_n$  and  $M_w/M_n$  (PDI) for each block in our triblock copolymer samples (Table S1), we can reconstruct the unique chain-length distribution function  $\rho_{OBO}(N)$  using a Schulz-Zimm distribution (Eq. S4), where  $N$  is the volume degree of polymerization of a given chain,  $N_{v,tot}$  is the average volume degree of polymerization of the sample,  $\Gamma$  is the gamma function, and  $k$  is a parameter describing the breadth of the distribution as given in Eq. S8.

$$\rho_{OBO}(N) = \frac{k^k N^{k-1} e^{-\left(\frac{kN}{N_{v,tot}}\right)}}{\Gamma(k) N_{v,tot}^k} \quad \text{Eq. S7}$$

$$k = \frac{1}{PDI-1} \quad \text{Eq. S8}$$

The resulting distributions are weighted by the volume degree of polymerization to yield the volume fraction as a function of  $N$  (panel (d) in manuscript Figures 1 and 2).

The approximate critical  $N_v$  for each solution morphology was determined graphically based on a previously determined model OB diblock copolymer phase portrait for 1 wt% solutions.<sup>9</sup> The order parameters for the phase diagram are the poly(1,4-butadiene) core volume degree of polymerization,  $N_{PB}$ , and the weight fraction of the hydrophilic block,  $w_O$ . Compositional polydispersity in these samples implies that each chain has roughly the same length O endblocks and this assumption is used to determine the dependence of  $N_{PB}$  on  $w_O$  for each sample (Figure S8, OBO-w42 shown). These graphs are then overlaid on the OB diblock phase portrait with identical axis ranges (Figure S9) to determine

the approximate critical values of  $N_{PB}$  and hence  $N_v = N_{PB} + N_{PEO}$  that are plotted in manuscript Figures 1 (d) and 2 (d). A table containing these values for all polydisperse samples is provided (Table S2).

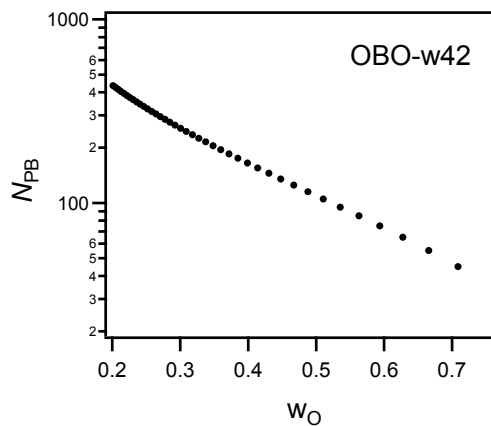

**Figure S8.** Dependence of  $N_{PB}$  on  $w_O$  across the inter range of possible  $w_O$ s for OBO-w42.

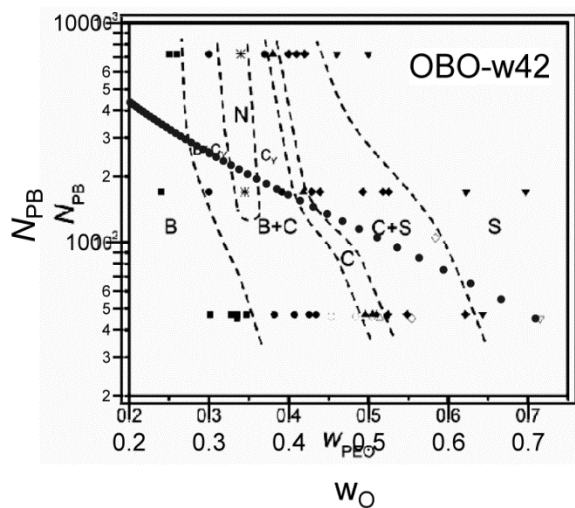

**Figure S9.** Overlay of the model OB diblock copolymer micellar phase behavior with the  $N_{PB}$  dependence on  $w_O$  for OBO-w48 on identical axis scales. Critical points are determined from where the dots intersect the approximate transition lines (black dashes). The network phase (N) and y-junctions ( $C_y$ ) (specific C + B coexistences) have been omitted for clarity.

**Table S2.**  $N$ -dependent Phase Boundaries for Micellar Aggregation Polydisperse OBO Samples

|                | OBO-w18 | OBO-w24 | OBO-w42 | OBO-w58 |
|----------------|---------|---------|---------|---------|
| S at $N_v <$   | 64      | 76      | 169     | 335     |
| S+C at $N_v <$ | 81      | 95      | 213     | 422     |
| C at $N_v <$   | 93      | 109     | 243     | 483     |
| C+B at $N_v <$ | 127     | 150     | 334     | 663     |

Critical values for  $N_v = N_{PB,crit} + N_{PEO}$  are shown for each polydisperse sample. The first row holds values of  $N_v$  above which spherical micelles (S) are the preferred morphology. The second row indicates values of  $N_v$  above which spherical micelles are expected in coexistence with cylinders (C). The third row indicates the  $N_v$  above which only cylinders are expected, and the fourth row are  $N_v$ s above which cylinders are expected in coexistence with vesicle bilayers (B), but below which only bilayers are expected.

## Ellipsoid mean curvature calculation

The general equation of an ellipsoid is given by:

$$\frac{x^2}{a^2} + \frac{y^2}{b^2} + \frac{z^2}{c^2} = 1$$

This surface can be parameterized by two coordinates  $u$  and  $v$  using:

$$x = a \cos u \sin v$$

$$y = b \sin u \sin v$$

$$z = c \cos v$$

$$u(x, y) = \text{atan}\left(\frac{a y}{b x}\right)$$

$$v(x, y) = \text{asin}\left(\frac{x + y}{a \cos(u(x, y)) + b \sin(u(x, y))}\right)$$

The mean curvature is given by:<sup>10</sup>

$$H = \frac{a b c [3 (a^2 + b^2) + 2 c^2 + (a^2 + b^2 - 2 c^2) \cos(2 v) - 2(a^2 - b^2) \cos(2 u) \sin^2 v]}{8 [a^2 b^2 \cos^2 v + c^2 (b^2 \cos^2 u + a^2 \sin^2 u) \sin^2 v]^{3/2}}$$

The curvature along the semimajor axis ( $x$ ) of the average prolate spheroid is calculated in MathCad using  $a = 18$  nm,  $b = c = 13$  nm along the surface where  $y = 0$ ,  $-18 \leq x \leq 18$ .

## References

1. Schmitt, A. L.; Mahanthappa, M. K., Polydispersity-Driven Shift in the Lamellar Mesophase Composition Window of OBO Triblock Copolymers. *submitted* **2011**.
2. Fetters, L. J.; Lohse, D. J.; Richter, D.; Witten, T. A.; Zirkel, A., Connection between Polymer Molecular Weight, Density, Chain Dimensions, and Melt Viscoelastic Properties. *Macromolecules* **1994**, 27, (17), 4639-47.
3. Jain, S. Aqueous Mixtures of Block Copolymer Surfactants. Thesis, University of Minnesota, Twin Cities, MN, 2005.
4. Ilavsky, J.; Jemian, P. R., Irena: tool suite for modeling and analysis of small-angle scattering. *J. Appl. Crystallogr.* **2009**, 42, (2), 347-353.
5. Wunderlich, B., *Macromolecular Physics*. Academic Press: New York, 1980; Vol. Vol. 3.
6. *Polymer Data Handbook*. 2nd ed.; Oxford University Press: New York, 2009.
7. Christenson, H. K., Confinement effects on freezing and melting. *J. Phys. Condens. Mat.* **2001**, 13, (11), R95-R133.
8. Won, Y.-Y.; Davis, H. T.; Bates, F. S.; Agamalian, M.; Wignall, G. D., Segment distribution of the micellar brushes of poly(ethylene oxide) via small-angle neutron scattering. *J. Phys. Chem. B* **2000**, 104, (30), 7134-7143.
9. Jain, S.; Bates, F. S., On the Origins of Morphological Complexity in Block Copolymer Surfactants. *Science* **2003**, 300, (5618), 460-464.
10. Weisstein, E. W. Ellipsoid. <http://mathworld.wolfram.com/Ellipsoid.html>
